# Supplementary material for: Stripe Rust Effector Pst_9302 Inhibits Wheat Immunity to Promote Susceptibility
Source: MDPI journal article supplement (doi:10.3390/plants13010094), 2023-12-27
Supplement: s1 [file s1]

## Supporting Information

**Article title:** Stripe Rust Effector Pst\_9302 Inhibits Wheat Immunity to Promote Susceptibility

**Author:** Haibin Zhao, Jiangyu Huang, Xiaoyan Zhao, Ligang Yu, Xiaodong Wang, Congcong Zhao, Hojjatollah Rabbani nasab, Chunlei Tang \* and Xiaojie Wang \*

**Figure S1** Prediction of the signal peptide of Pst\_9302

**Figure S2** Interaction between Pst\_9302 and its putative targets identified by Y2H

**Table S1** Primers used in this study

**Table S2** Putative targets of Pst\_9302 identified by Y2H assay

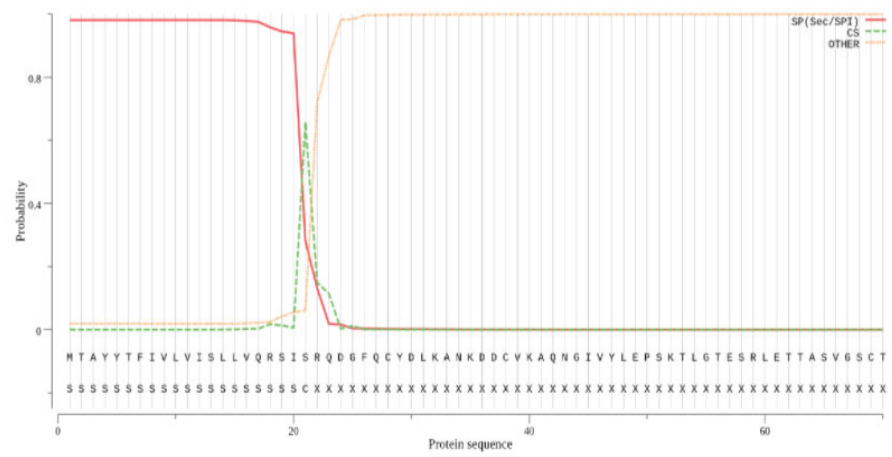

**Figure S1** Prediction of the signal peptide of Pst\_9302

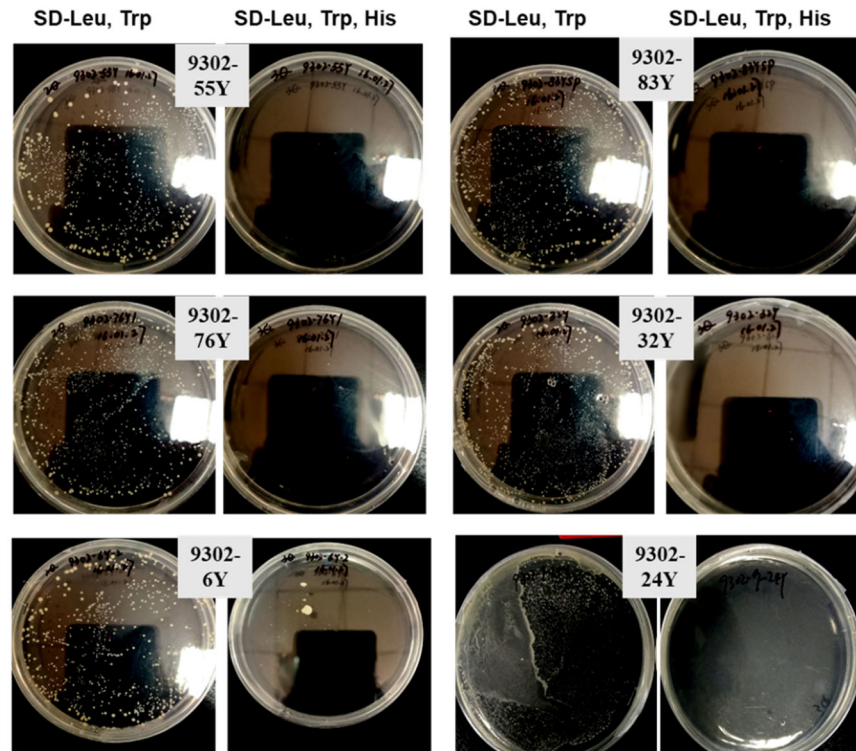

**Figure S2** Interaction between Pst\_9302 and its putative targets identified by Y2H. 2Q represents the SD/-Trp-Leu medium and 3Q represents SD/-Trp-Leu-His medium. The 6 genes including Oryzain alpha chain (named 9302-55Y), Heat shock cognate 70 kDa protein 1 (9302-32Y), Bark storage protein A (9302-83Y), putative protein phosphatase 2C 41 (9302-76Y), membrane magnesium transporter (9-24Y), and Voltage-dependent anion-selective channel protein (9-6Y).

**Table S1 Primers used in this study.**

| Primer name                       | Sequence (5'-3')               | Purpose         |
|-----------------------------------|--------------------------------|-----------------|
| qRT-PsEF-F                        | TTCGCCGTCCGTGATATGAGAC         | qRT-PCR         |
|                                   | AA                             |                 |
| qRT-PsEF-R                        | ATGCGTATCATsGGTGGTGGAG         |                 |
|                                   | TGA                            |                 |
| qRT-Pst_9302-F                    | CGACTTGAAACAACTGCGT            |                 |
| qRT-Pst_9302-R                    | GCCTTTGCGGCGATA                | Suppress PCD    |
| PVX-Pst_9302 <sup>ΔSP</sup> -F    | gtaccgagg                      |                 |
|                                   | AGGCAAGATGGATTCC               |                 |
| PVX-Pst_9302 <sup>ΔSP</sup> -R    | ataagaatgcggccgcGTAATTCGAAG    |                 |
|                                   | GCATA                          |                 |
| PVX-Bax-F                         | gtaccgaggATGGACGGGTCCGGG       |                 |
| PVX-Bax-R                         | ataagaatgcggccgcGCCCATCTTCTT   |                 |
|                                   | CCAG                           |                 |
| pGBKT7-Pst_9302 <sup>ΔSP</sup> -F | aggaggacctgcatatg              |                 |
|                                   | AGGCAAGATGGATTCC               |                 |
| pGBKT7-Pst_9302 <sup>ΔSP</sup> -R | cggatccccgggaattc              | Pull-down assay |
|                                   | GTAATTCGAAGGCATA               |                 |
| pGADT7-TaVDAC1-F                  | ccagattacgctcatatgATGGGCGGC    |                 |
|                                   | CCAGGCCTCT                     |                 |
| pGADT7-TaVDAC1-R                  | cccaccgggtggaattcAGGCTTGAGA    |                 |
|                                   | GCAATA                         |                 |
| pET32a-Pst_9302 <sup>ΔSP</sup> -F | GGATCCAGGCAAGATGGATTCC         |                 |
| pET32a-Pst_9302 <sup>ΔSP</sup> -R | CTCGAGGTAATTCGAAGGCATA         |                 |
| pGEX4T-1-TaVDAC1-F                | GGATCCATGGGCGGC                |                 |
|                                   | CCAGGCCTCT                     |                 |
| pGEX4T-1-TaVDAC1-R                | CTCGAGTTAAGGCTTGAGAGCA         | TTSS            |
|                                   | ATA                            |                 |
| Higs-Pst_9302-F                   | tagctagctgattaattaaGCTTATTAC   |                 |
|                                   | ACATTT                         |                 |
| Higs-Pst_9302-R                   | ttgctagctgagcggccgcACTCTCCGTA  |                 |
|                                   | CCAAG                          |                 |
| pEDV6- Pst_9302 <sup>ΔSP</sup> -F | ggggacaagttgtacaaaaagcaggcttc  |                 |
|                                   | AGGCAAGATGGATTCC               |                 |
| pEDV6- Pst_9302 <sup>ΔSP</sup> -R | ggggaccactttgtacaagaaagctgggtc |                 |
|                                   | GTAATTCGAAGGCATA               |                 |

Table S2 Putative targets of Pst\_9302 identified by Y2H assay.

|    | Annotation                                                 |           | Genebank       | Species                               | Counts |
|----|------------------------------------------------------------|-----------|----------------|---------------------------------------|--------|
| 1  | Chloroplast-localized binding protein 1                    | PtrTox A- | EMT15486.1     | <i>Triticum aestivum</i>              | 3      |
| 2  | <b>Oryzain alpha chain</b>                                 |           | EMS56635.1     | <i>Triticum urartu</i>                | 2      |
| 3  | endoglucanase 11                                           |           | EMS60957.1     | <i>Aegilops tauschii</i>              | 1      |
| 4  | <b>Heat shock cognate 70 kDa protein 1</b>                 |           | EMS51616.1     | <i>Triticum urartu</i>                | 4      |
| 5  | <b>Voltage-dependent anion-selective channel protein</b>   |           | P46274.1       | <i>Triticum aestivum</i>              | 1      |
| 6  | Proteasome subunit alpha type-6                            |           | BAJ85020.1     | <i>Hordeum vulgare subsp. Vulgare</i> | 6      |
| 7  | <b>WRKY transcription factor 3</b>                         |           | ABR87001.1     | <i>Hordeum vulgare subsp. Vulgare</i> | 2      |
| 8  | Elicitor-responsive protein 1                              |           | EMS48714.1     | <i>Triticum urartu</i>                | 2      |
| 9  | Potassium transporter 7                                    |           | EMT06515.1     | <i>Aegilops tauschii</i>              | 1      |
| 10 | <b>membrane magnesium transporter</b>                      |           | XP_003579044.1 | <i>Brachypodium distachyon</i>        | 1      |
| 11 | ribosomal protein S20                                      |           | AFM95250.1     | <i>Triticum aestivum</i>              | 1      |
| 12 | Putative LRR receptor-like serine/threonine-protein kinase |           | EMT31498.1     | <i>Aegilops tauschii</i>              | 1      |
| 13 | cysteine protease(CP)                                      |           | EMS59857.1     | <i>Triticum aestivum</i>              | 1      |
| 14 | <b>putative protein phosphatase 2C 41</b>                  |           | EMS49328.2     | <i>Triticum urartu</i>                | 3      |
| 15 | Photosystem II 10kDa polypeptide, chloroplastic            |           | EMS68597.1     | <i>Triticum urartu</i>                | 1      |
| 16 | <b>Bark storage protein A</b>                              |           | EMT26191.      | <i>Aegilops tauschii</i>              | 1      |
| 17 | D-glycerate 3-kinase,chloroplastic                         |           | XP_003569572.1 | <i>Brachypodium distachyon</i>        | 1      |
| 18 | Myb family transcription factor APL                        |           | EMT23891.1     | <i>Aegilops tauschii</i>              | 1      |
| 19 | Hypothetical protein F775_09657                            |           | EMT09722.1     | <i>Aegilops tauschii</i>              | 2      |
| 20 | hypothetical protein TRIUR3_11299                          |           | EMS60957.1     | <i>Triticum urartu</i>                | 1      |
| 21 | hypothetical protein TRIUR3_30517                          |           | EMS46308.1     | <i>Triticum urartu</i>                | 1      |
| 22 | hypothetical protein F775_07261                            |           | EMT04007.1     | <i>Aegilops tauschii</i>              | 1      |

|    |                                 |         |            |                                 |   |
|----|---------------------------------|---------|------------|---------------------------------|---|
| 23 | hypothetical<br>TRIUR3_31004    | protein | EMS52954.1 | <i>Triticum<br/>urartu</i>      | 1 |
| 24 | hypothetical protein PSTG_16012 |         | KNE90550.1 | <i>Puccinia<br/>striiformis</i> | 2 |
| 25 | hypothetical protein PSTG_14684 |         | KNE91886.1 | <i>Puccinia<br/>striiformis</i> | 2 |
